# Supplementary material
Source: PubMed Central journal article supplement (PMC9667902)

# Interval between injury and first MRI (days)

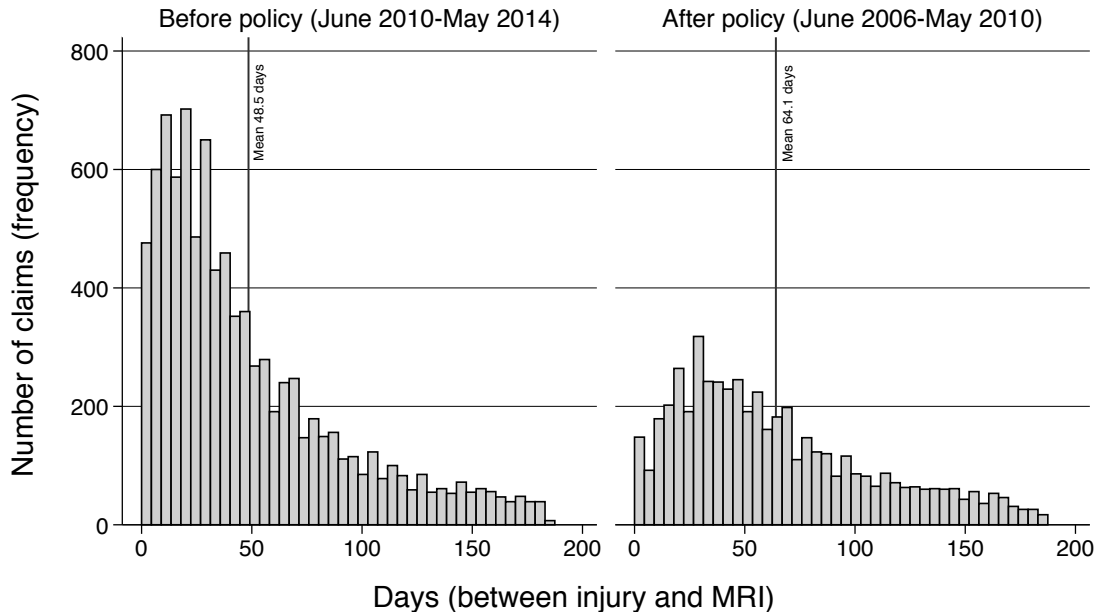

Graphs by before/after policy change

Supplement: NIHMS1815431-supplement-Supplemental_Digital_Content_2.pdf [file NIHMS1815431-supplement-Supplemental_Digital_Content_2.pdf]

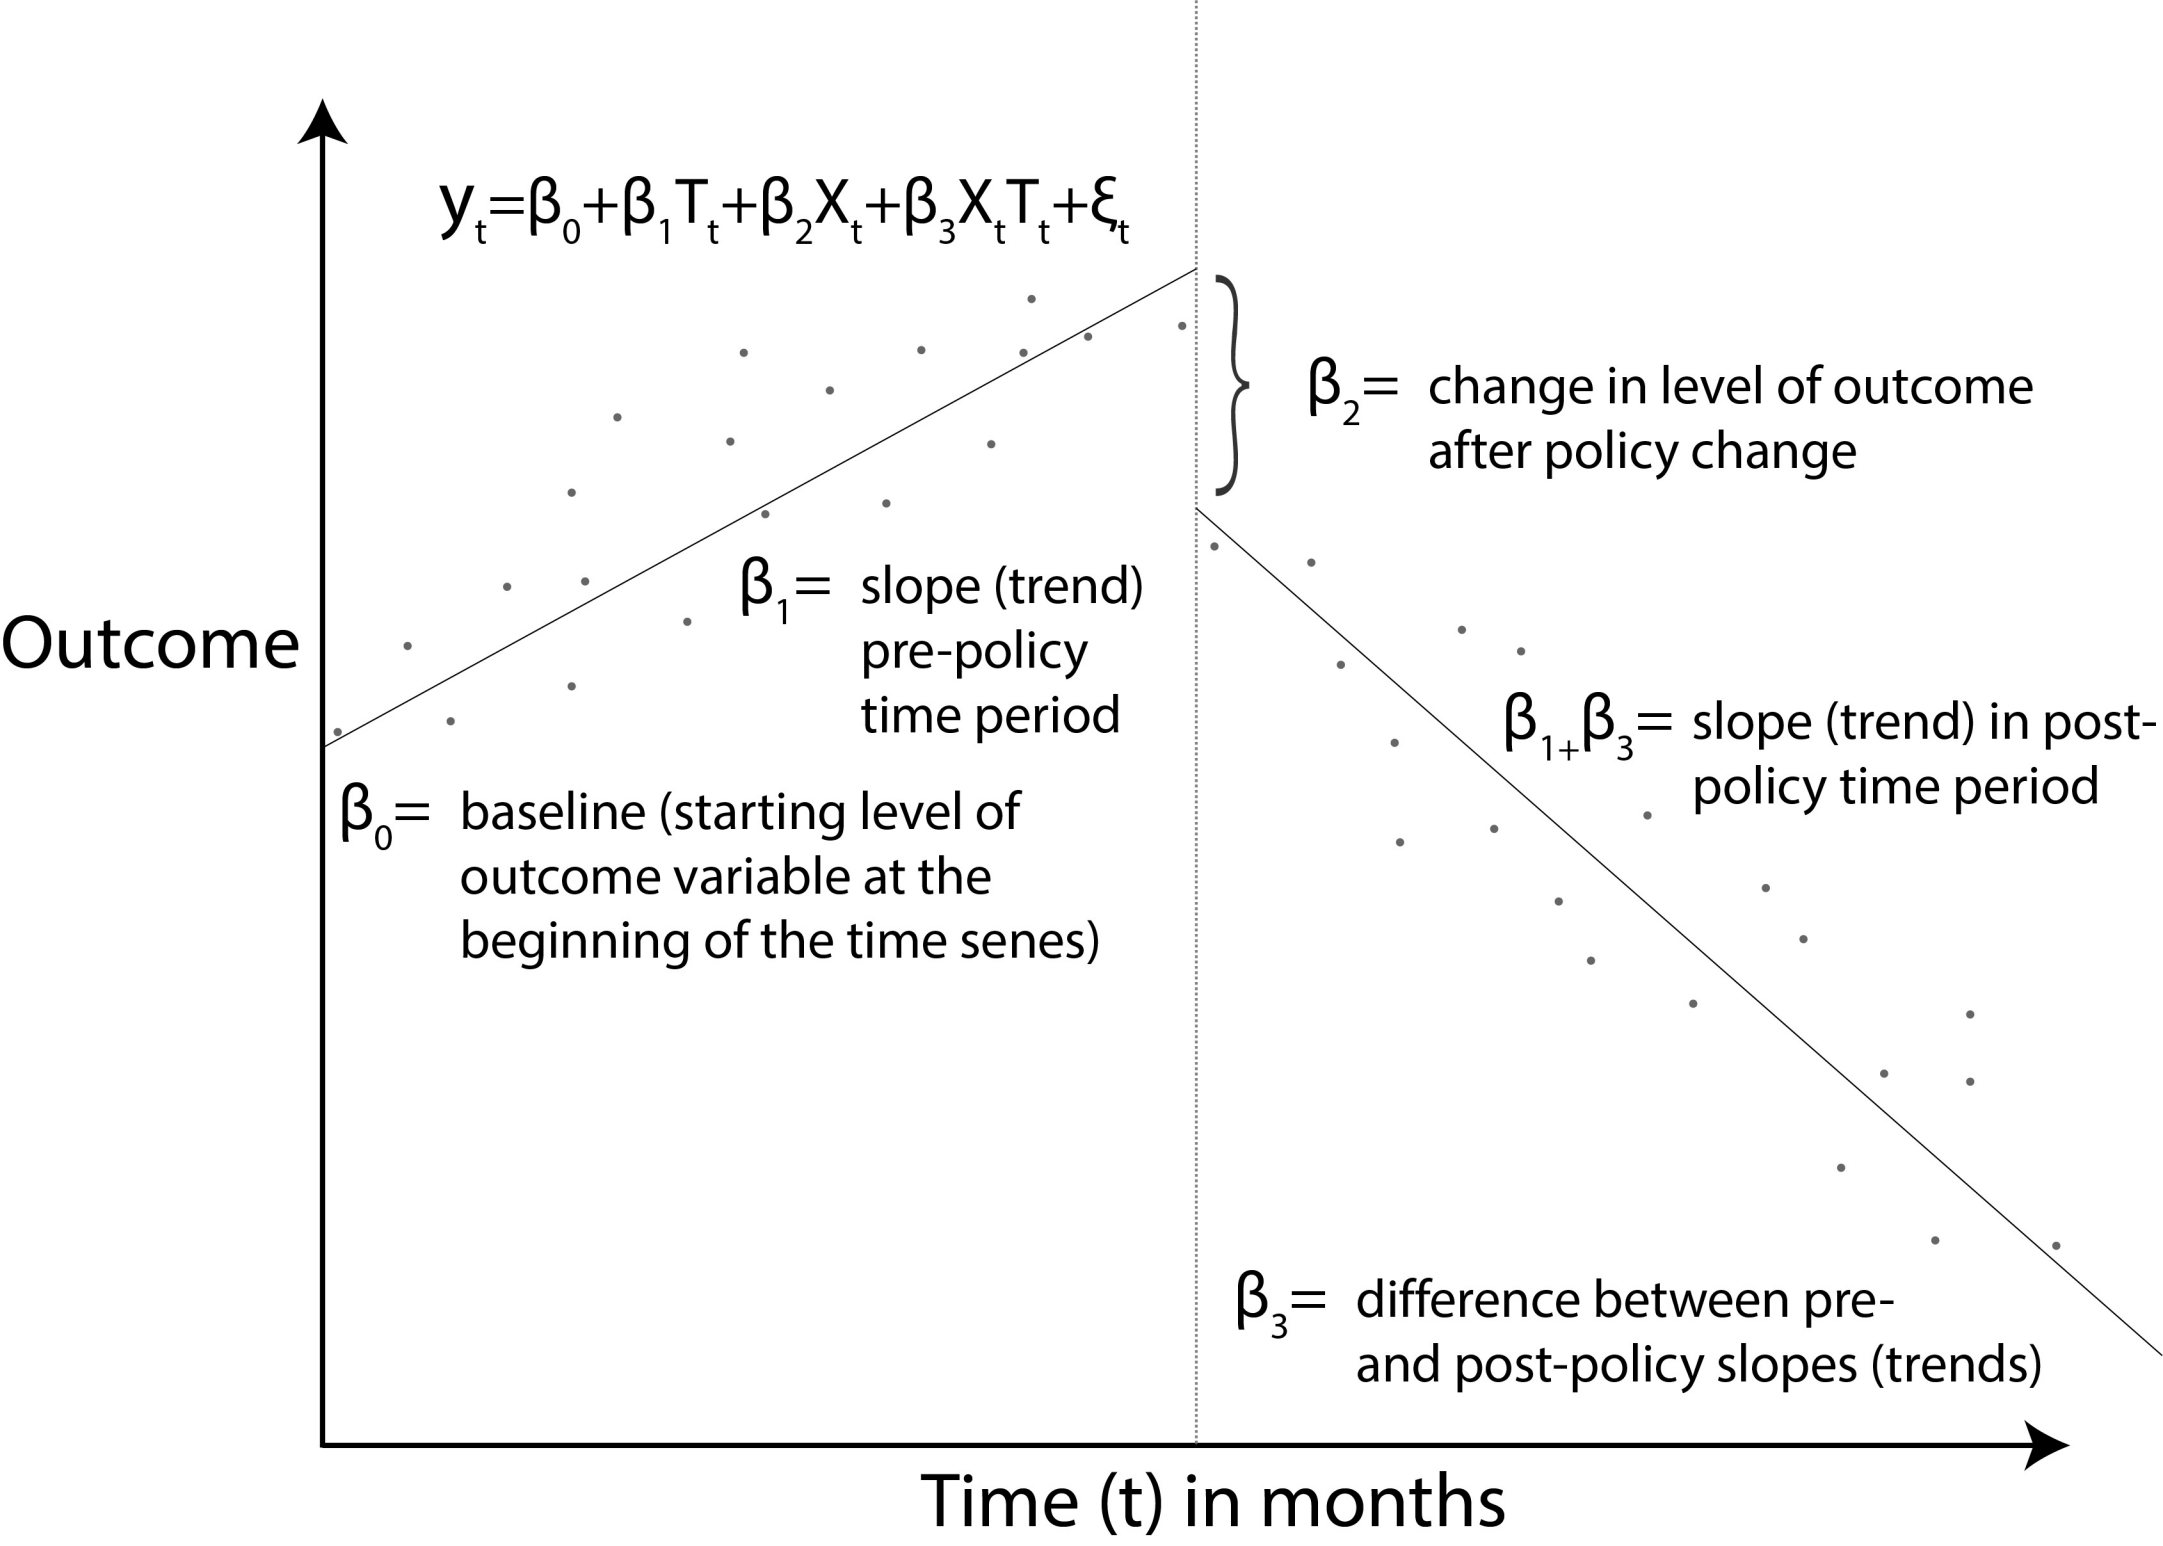

Supplement: NIHMS1815431-supplement-Supplemental_Digital_Content_3.pdf [file NIHMS1815431-supplement-Supplemental_Digital_Content_3.pdf]
